# Supplementary material for: Therapeutic Gene Silencing of CKAP5 leads to lethality in genetically unstable cancer cells.
Source: Research Square preprint supplement (doi:10.21203/rs.3.rs-1898494/v1), 2022-07-27
Supplement: Supplementary file 1 [file 599cd6f797772f83053897b4.docx]

CKAP5 expression across various solid cancer cell lines **A.** Standard curve of CKAP5 gene block **B.** mRNA copies of CKAP5 across various cell lines based on Gene block standard curve


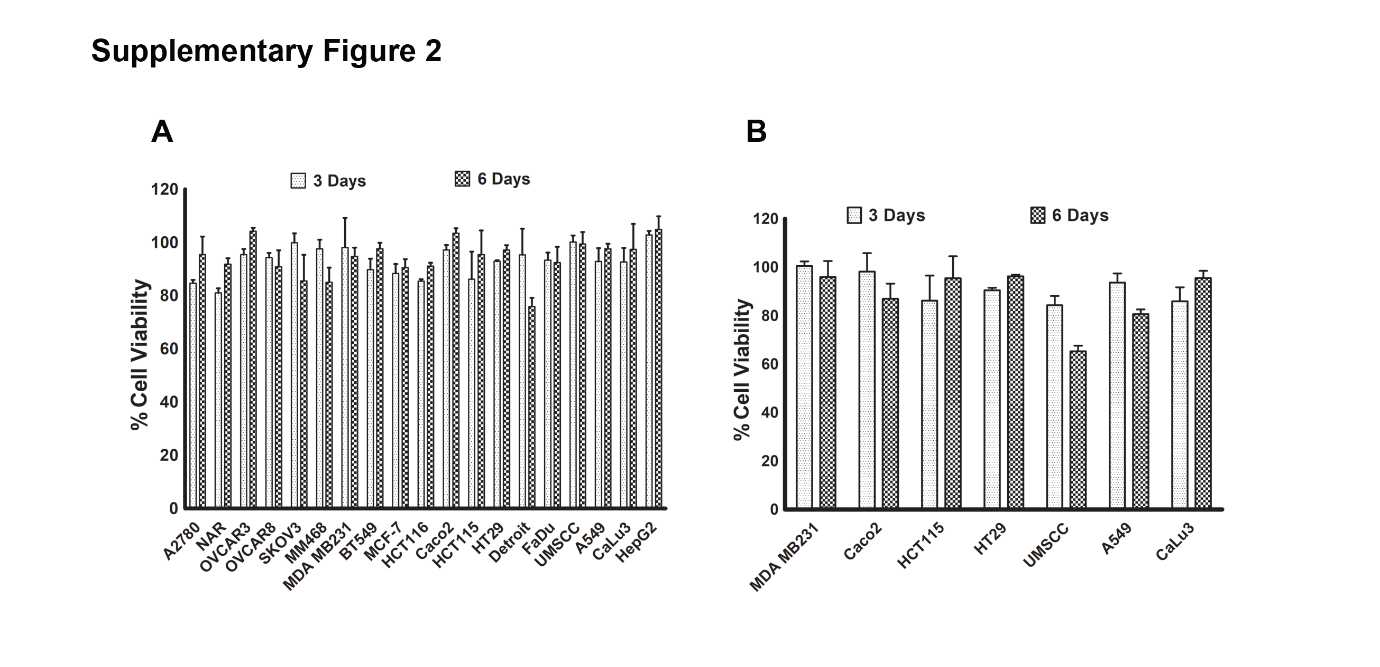


Toxicity of control siRNA-LNPs across various cancer cell lines **A**. Toxicity of NC5 across various cancer cell lines at a dose of 0.25µg/ml and **B**. at 1µg/ml after 3 and 6 days


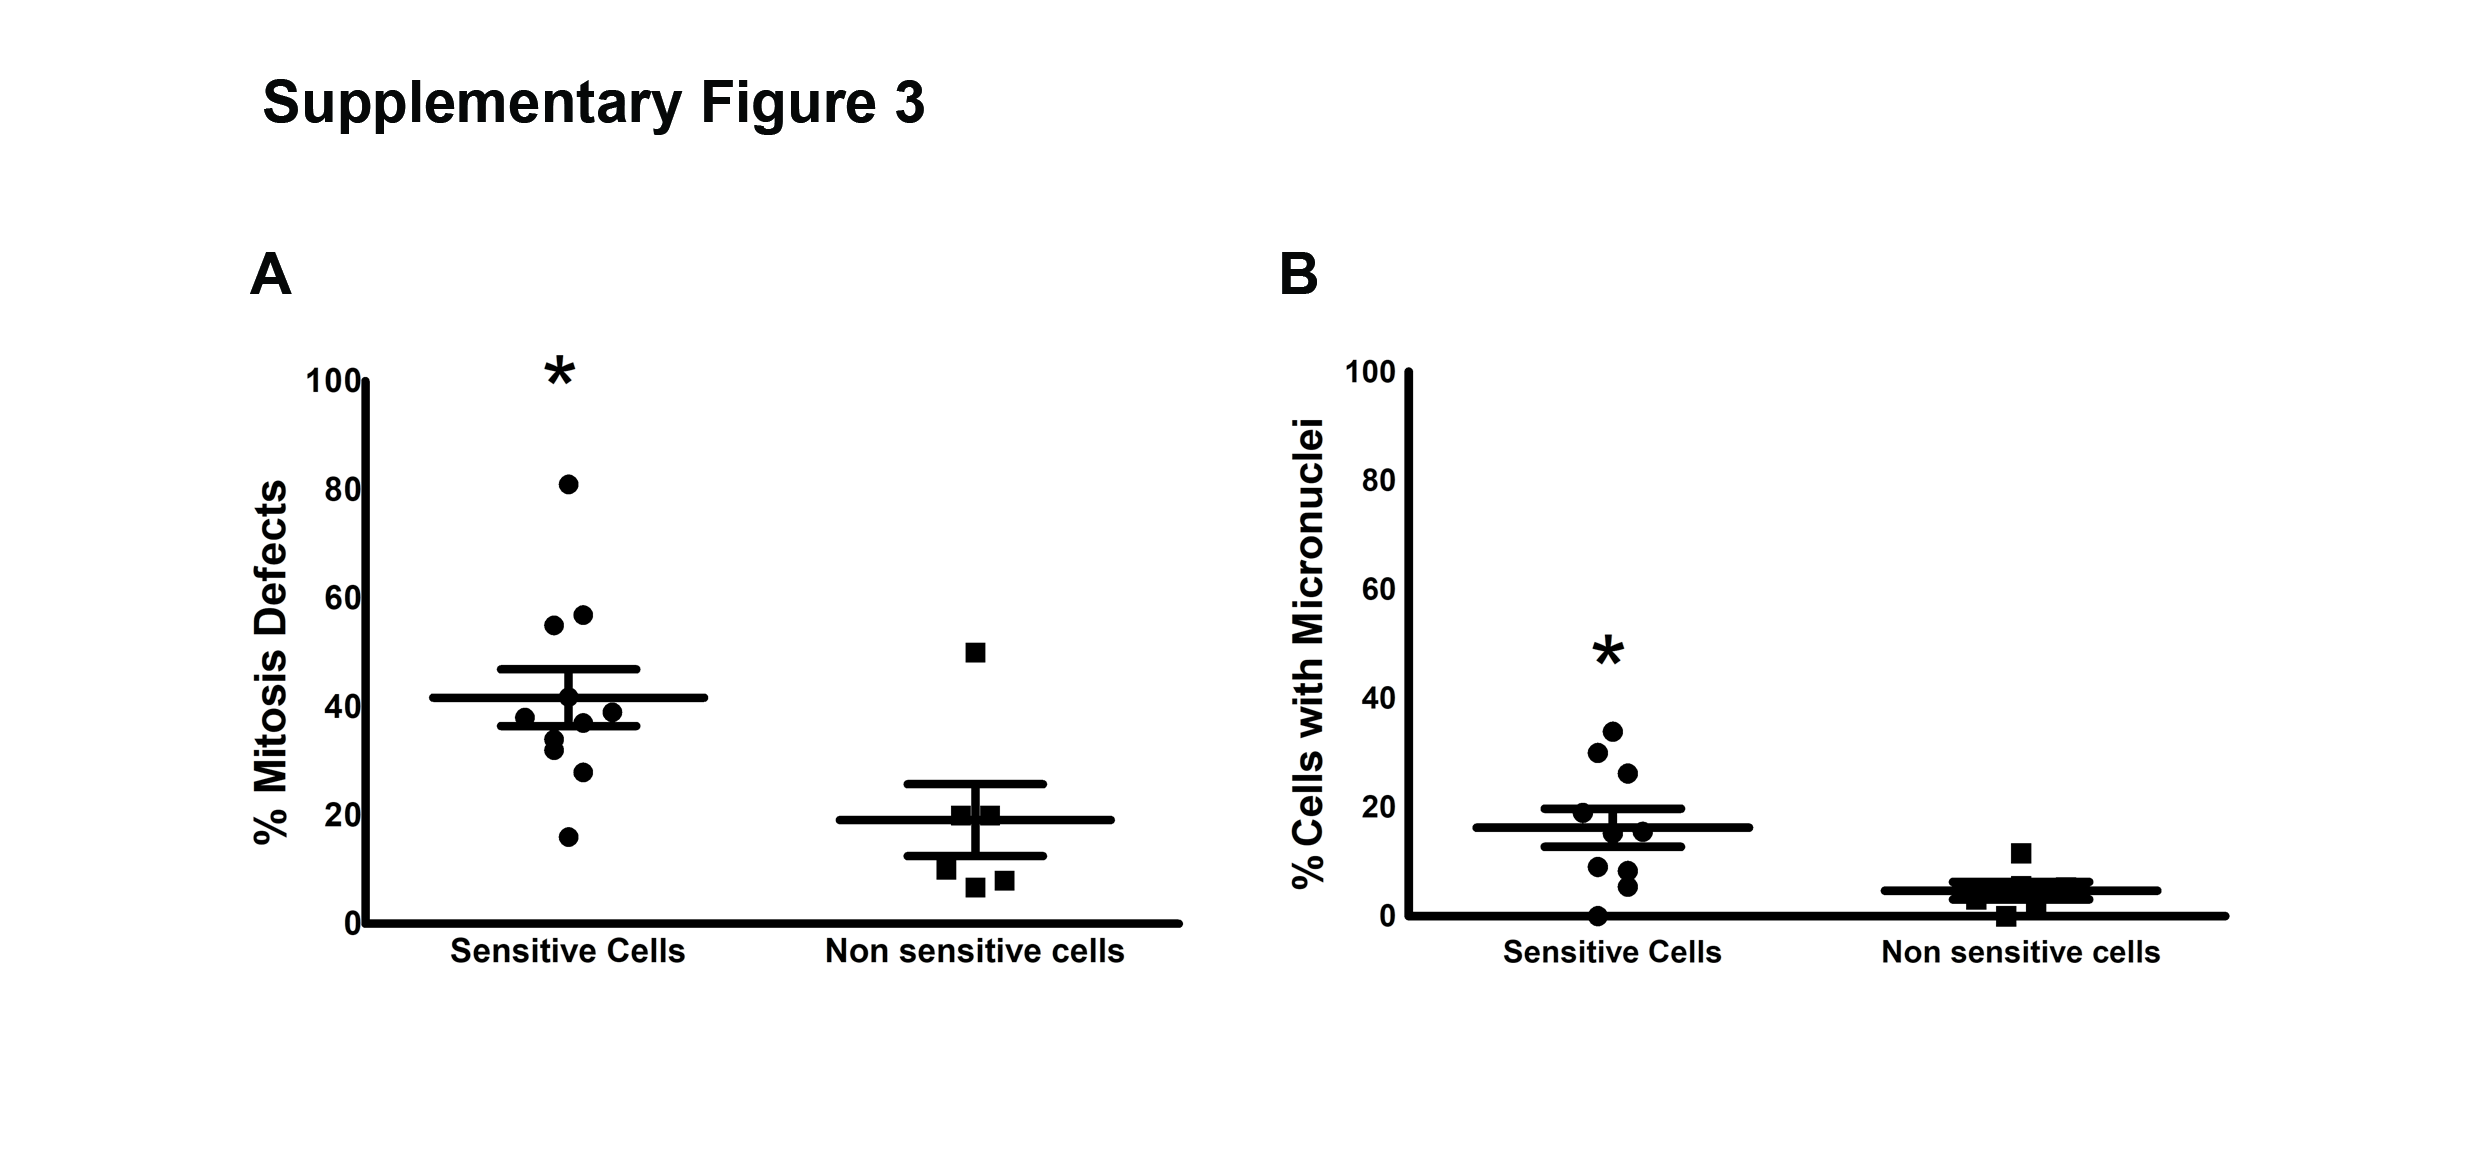


Comparison of genetic instability in CKAP5siRNA sensitive versus non sensitive cells **A**. Comparison of mitotic defects as measured by tubulin staining during mitosis **B**. Comparison of micronuclei formation as observed by DAPI staining


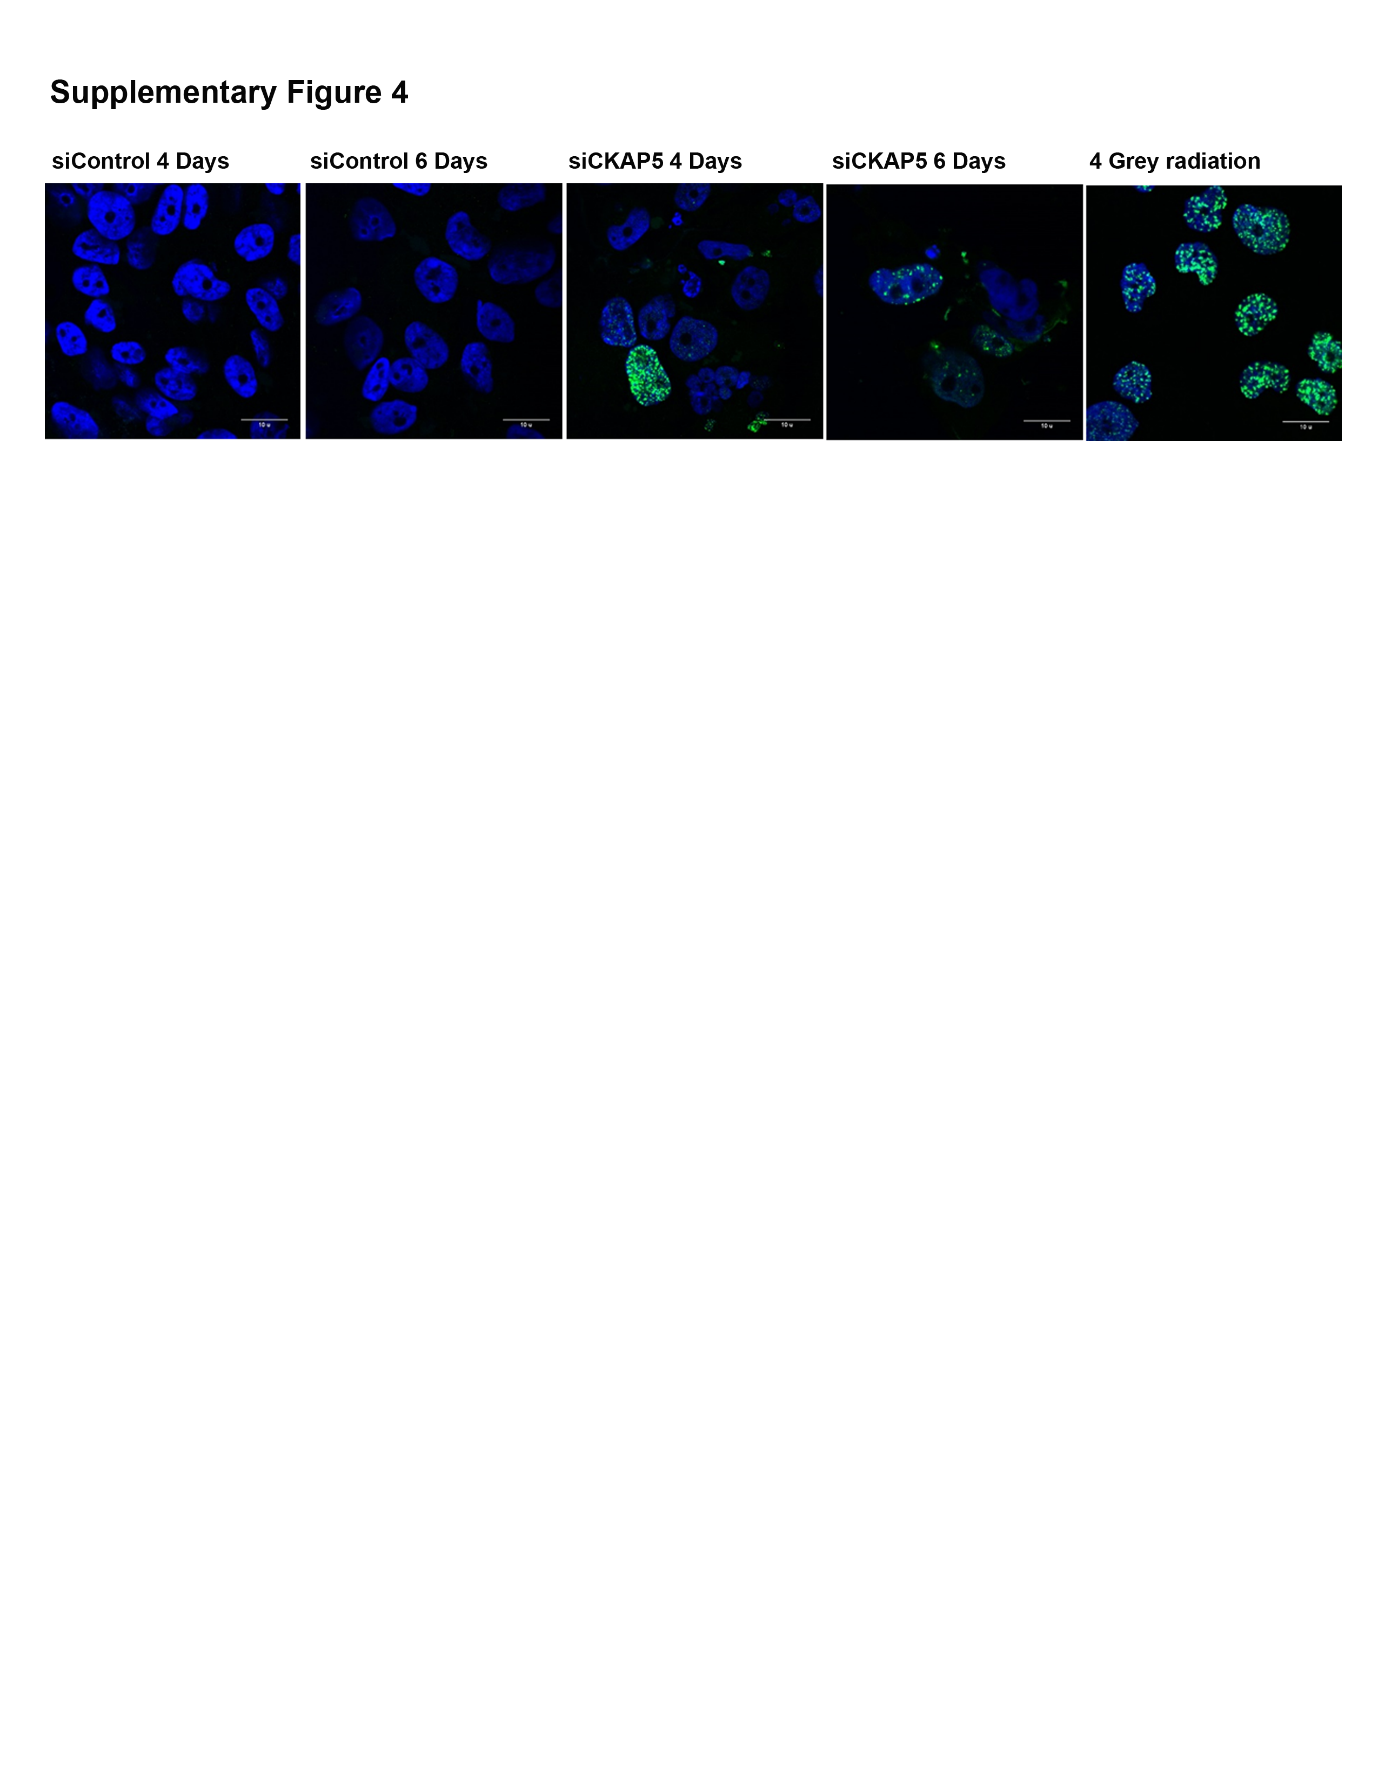


**Gamma H2A.X foci formation in NC5/CKAP5 knockdown cells**


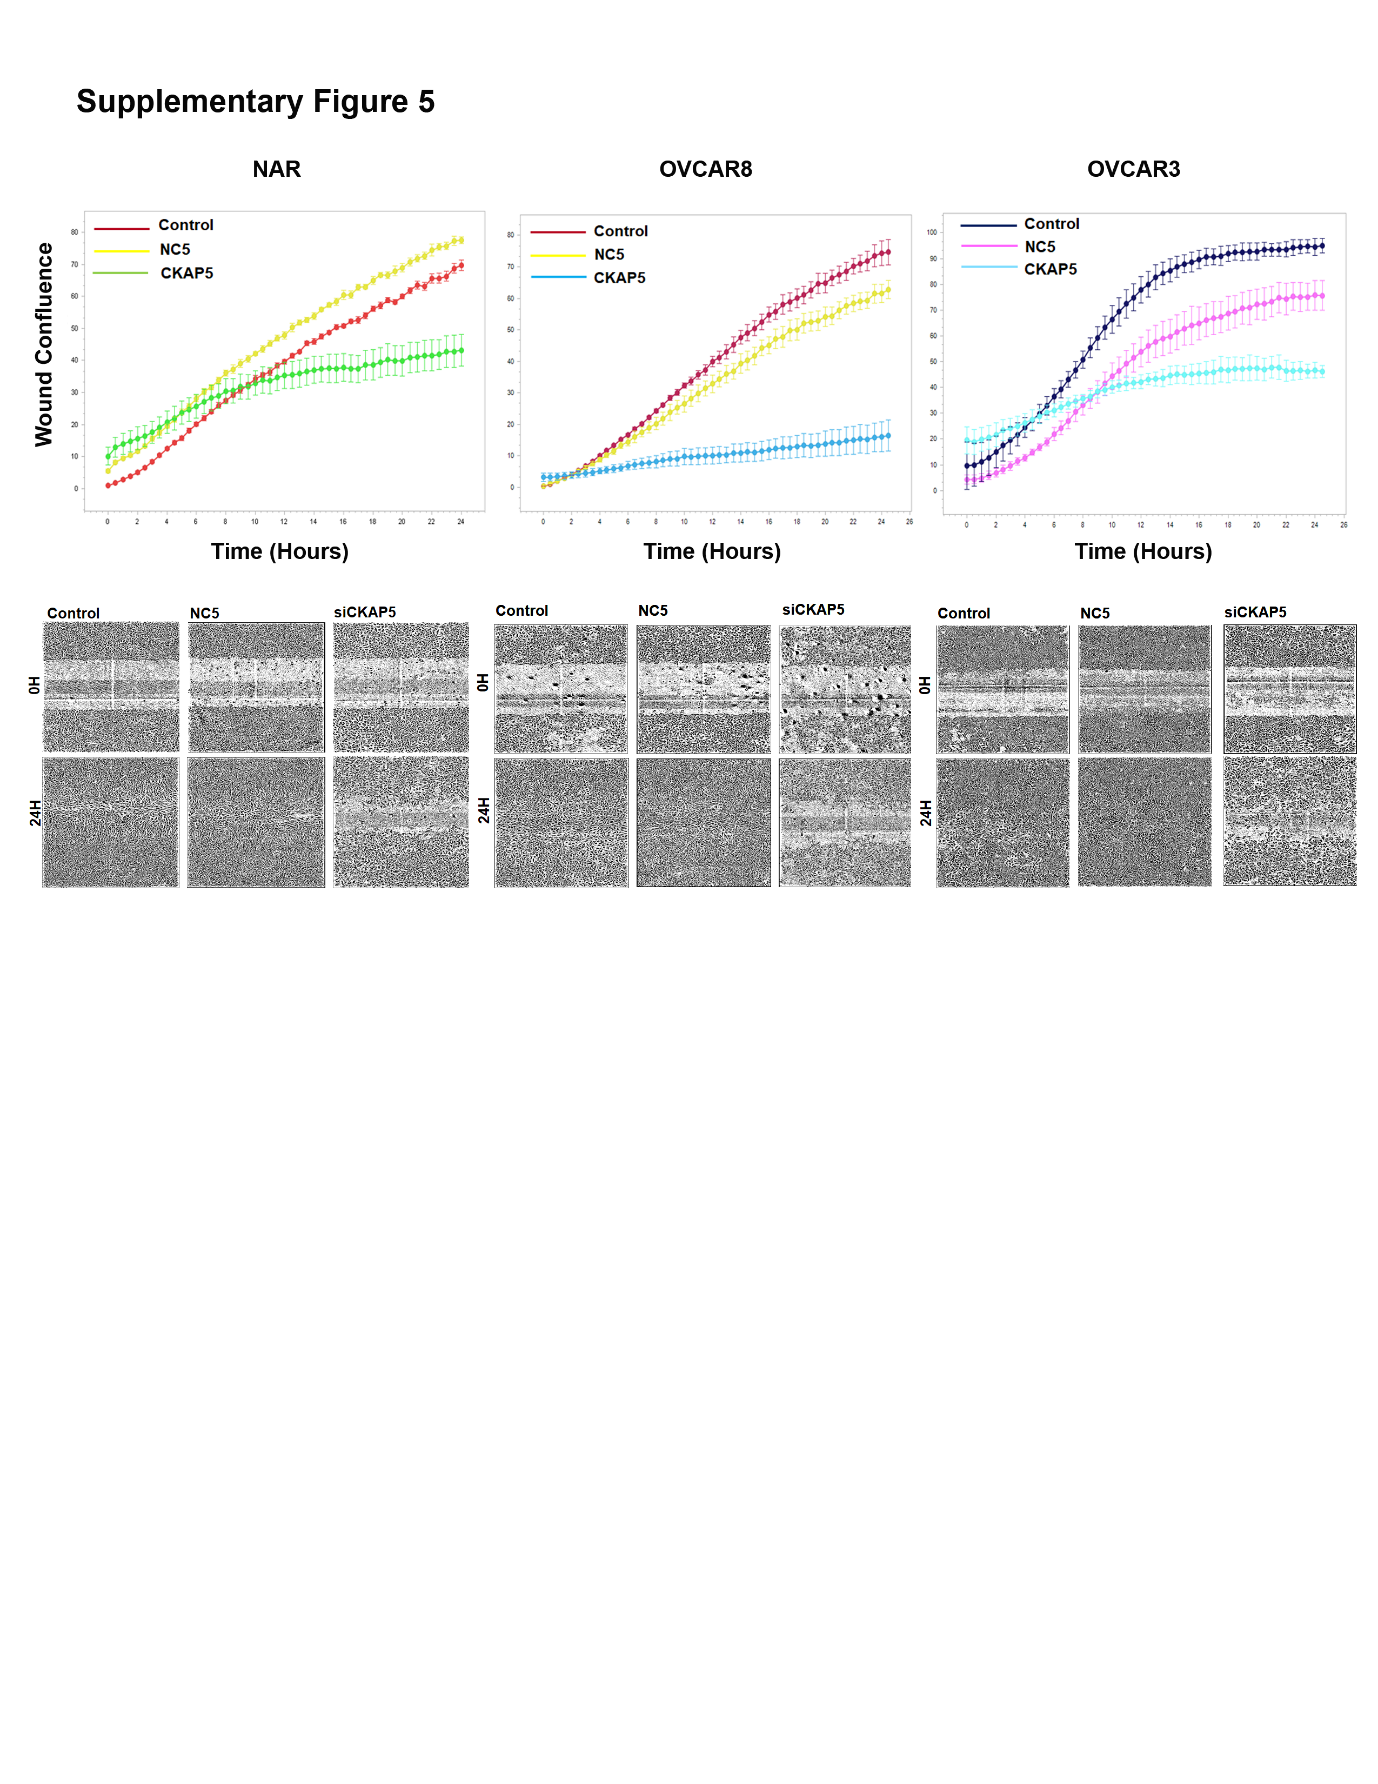


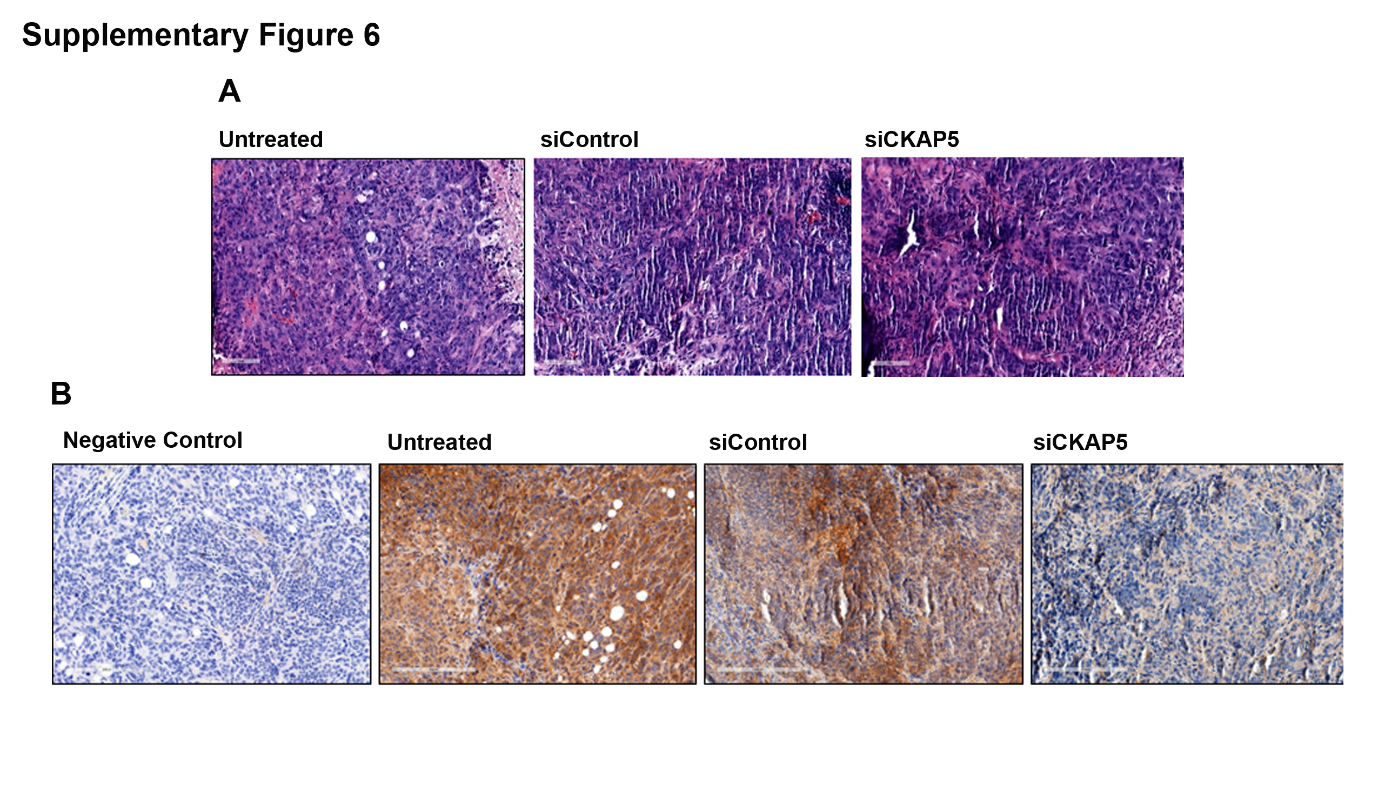


Histology of the xenografted tumour tissues extracted from control and CKAP5 silenced group of mice **A.** H&E staining of tumour tissues isolated from control, NC5 treated and siCKAP5RNA treated mice
**B. I**mmunohistochemistry of ovarian cancer peritoneal tumour tissue to show CKAP5 expression in control, NC5 and siCKAP5-LNP treated group

**Table 1**

**
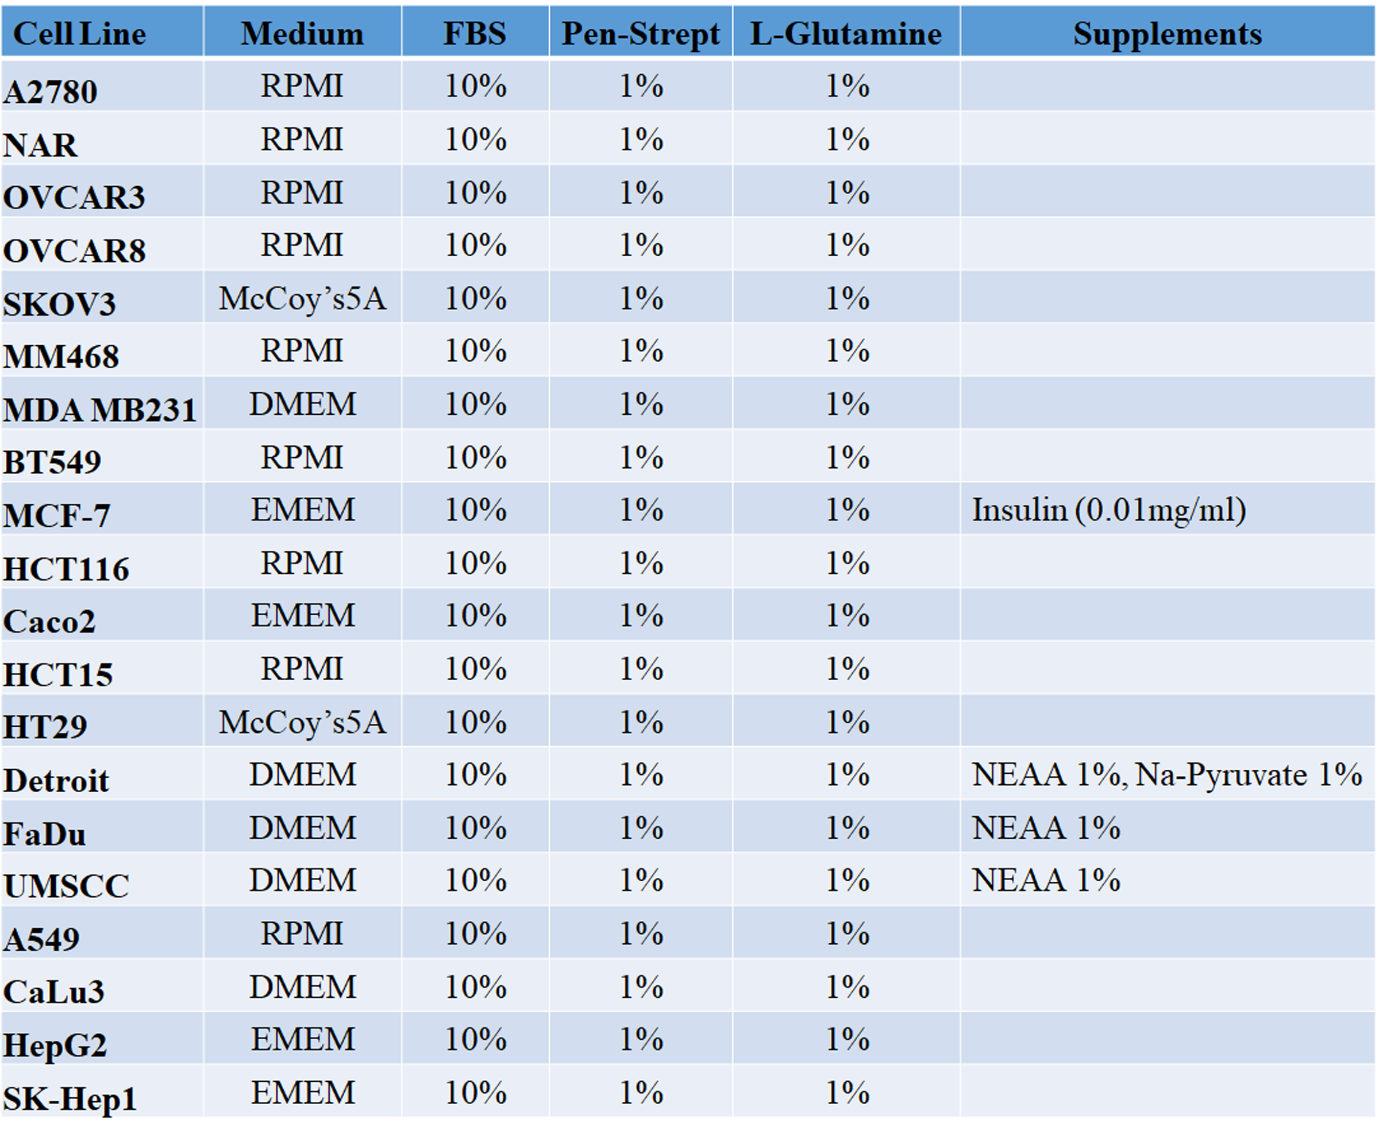
**

**Table 2**

**
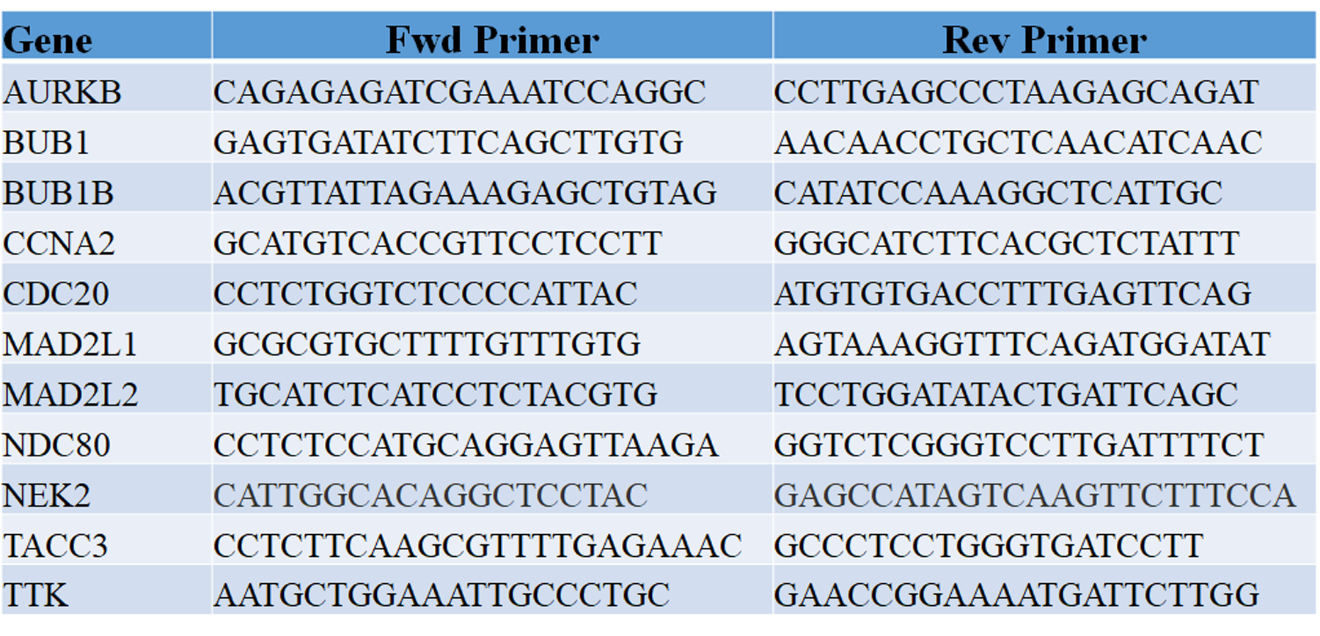
**
